# Supplementary figures and images for: A novel resin cement to improve bonding interface durability
Source: Royal Society of Chemistry journal article supplement (doi:10.1039/d2ra04446c), 2022-01-01

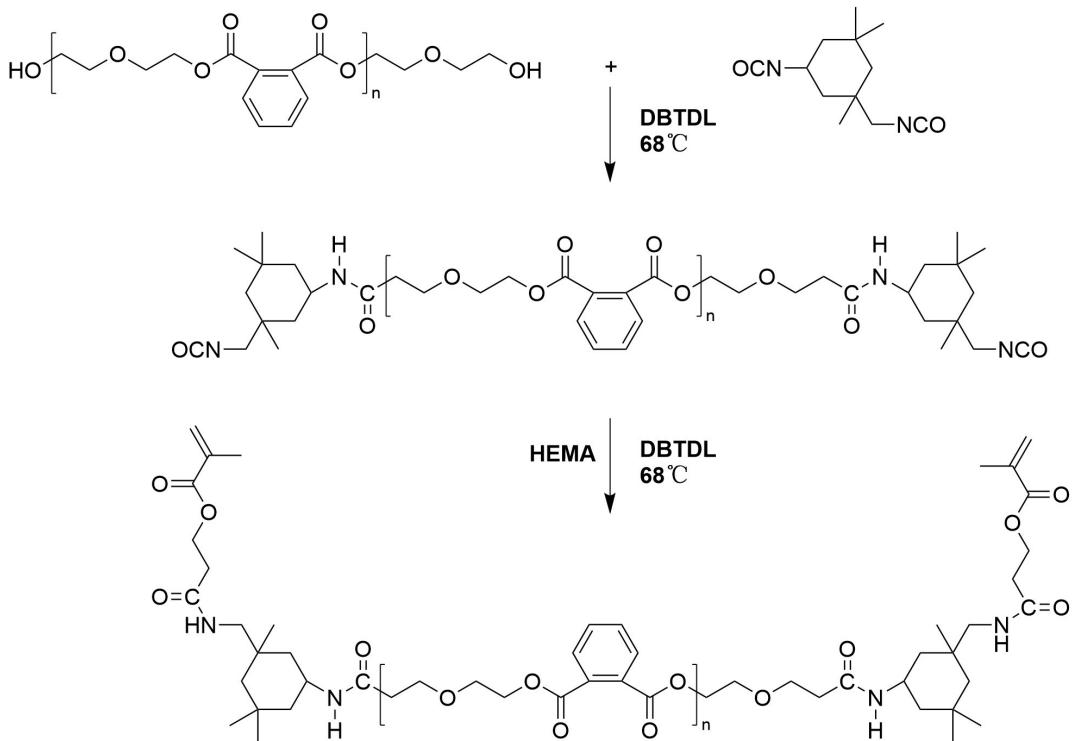

Supplement: d2ra04446c2.pdf [file d2ra04446c2.pdf]

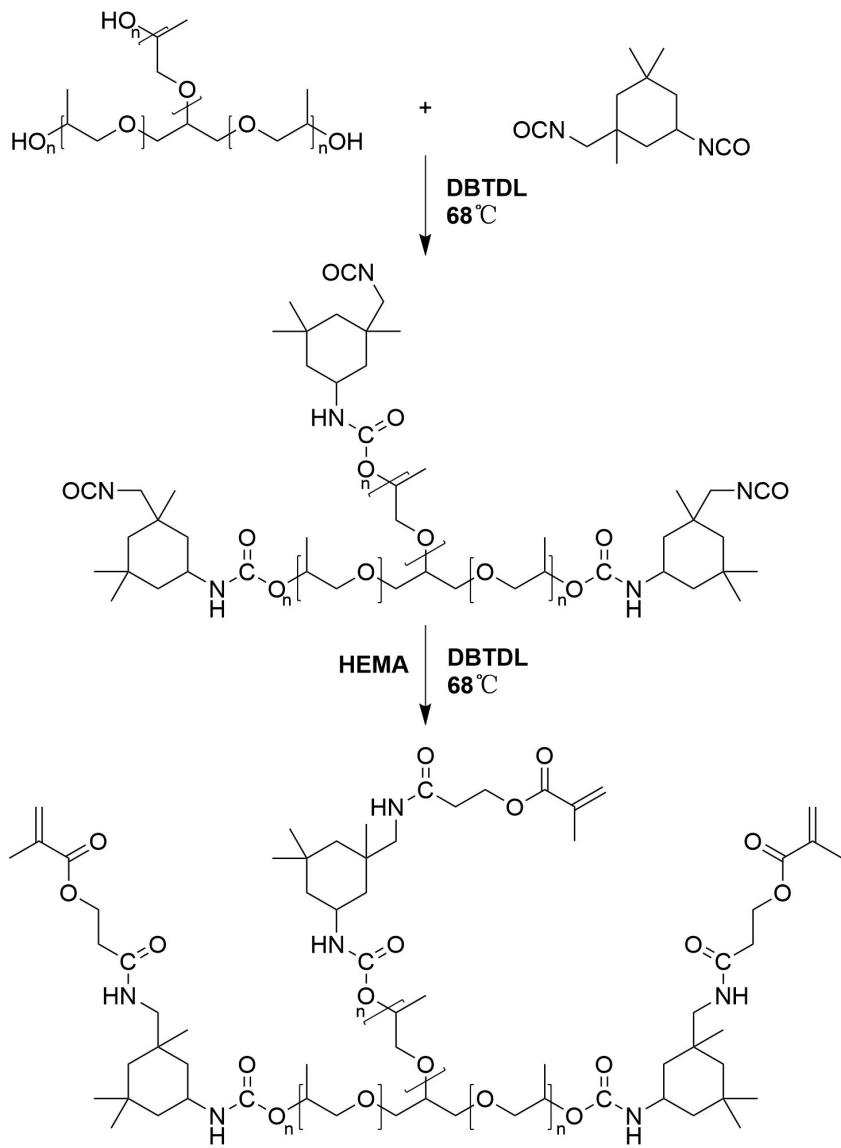

Supplement: d2ra04446c3.pdf [file d2ra04446c3.pdf]
